# Supplementary material for: Stoichiometry matters: correlation between antisite defects, microstructure and magnetic behavior in the cathode material Li1−zNi1+zO2
Source: Royal Society of Chemistry journal article supplement (doi:10.1039/d3ta01621h), 2023-01-01
Supplement: d3ta01621h1.pdf [file d3ta01621h1.pdf]

# Supporting Information – Stoichiometry matters: Correlation between antisite defects, microstructure and magnetic behavior in the cathode material $\text{Li}_{1-z}\text{Ni}_{1+z}\text{O}_2$

Damian Goonetilleke,<sup>a,†, #</sup> Björn Schwarz,<sup>b</sup> Hang Li,<sup>b</sup> Francois Fauth,<sup>c</sup> Emmanuelle Suard,<sup>d</sup> Stefan Mangold,<sup>e</sup> Sylvio Indris,<sup>b</sup> Torsten Brezesinski,<sup>a</sup> Matteo Bianchini,<sup>a,e,‡</sup> Daniel Weber<sup>b,#,\*</sup>

a Battery and Electrochemistry Laboratory (BELLA), Institute of Nanotechnology, Karlsruhe Institute of Technology (KIT), Hermann-von-Helmholtz-Platz 1, 76344 Eggenstein-Leopoldshafen, Germany

b Institute for Applied Materials-Energy Storage Systems (IAM-ESS), Karlsruhe Institute of Technology (KIT), 76344, Eggenstein-Leopoldshafen, Germany

c CELLS—ALBA Synchrotron, E-08290 Cerdanyola del Vallès, Barcelona, Spain

d Institut Laue-Langevin (ILL), BP 156, 71 Avenue des Martyrs, 38042 Grenoble, France

e Institute for Photon Science and Synchrotron Radiation, Karlsruhe Institute of Technology (KIT), Hermann-von-Helmholtz-Platz 1, 76344 Eggenstein-Leopoldshafen, Germany

f BASF SE, Carl-Bosch-Strasse 38, 67056 Ludwigshafen, Germany

† Current Affiliation: Corporate Research and Development, Umicore, Watertorenstraat 33, 2250 Olen, Belgium

‡ University of Bayreuth, Bavarian Center for Battery Technology (BayBatt), Universitätsstrasse 30, 95447 Bayreuth, Germany

# equal author contribution.

\* Email : [daniel.weber3@kit.edu](mailto:daniel.weber3@kit.edu);

Exemplary SEM images for the determination of the particle size distribution

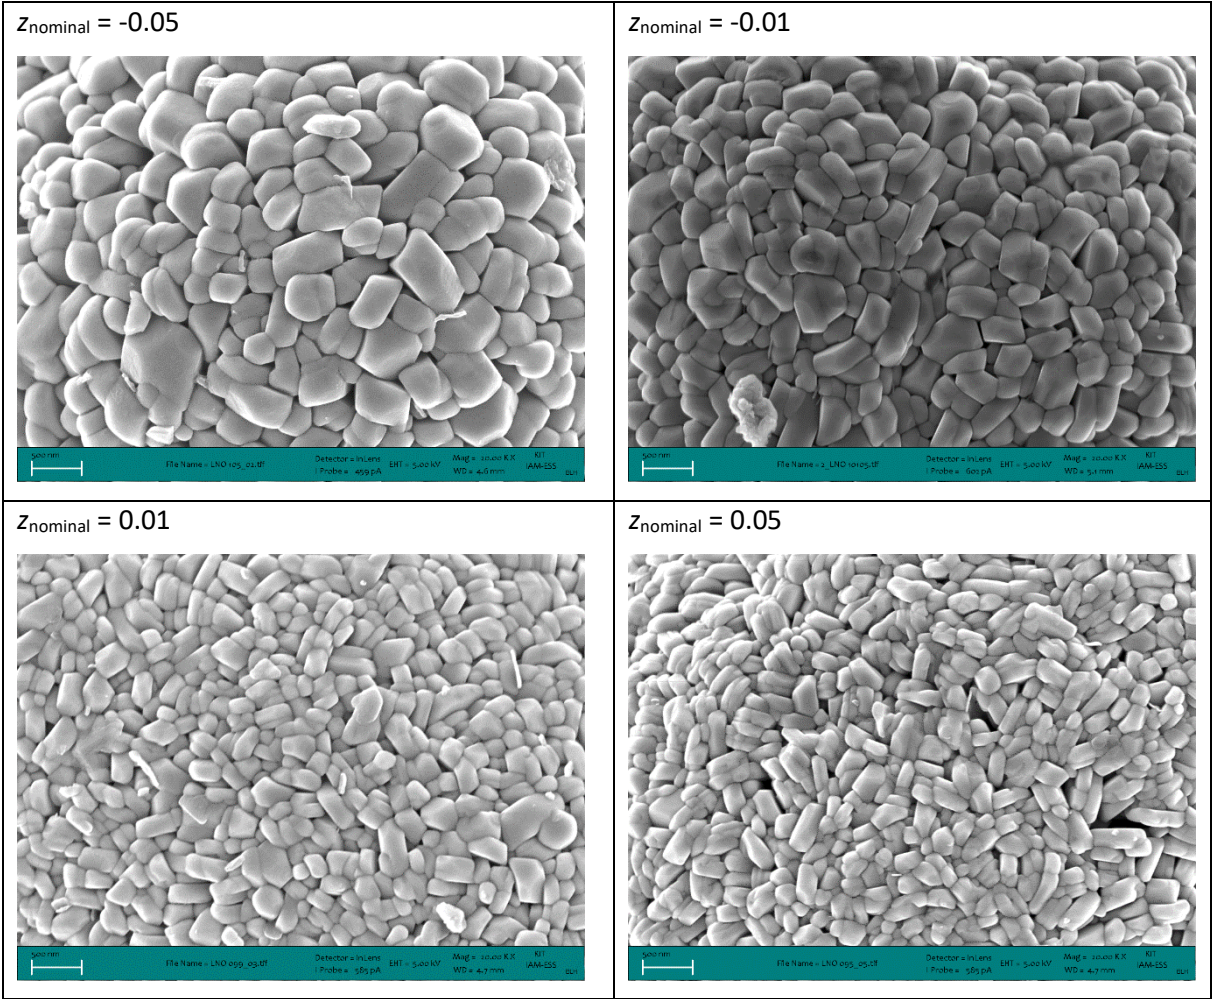

Figure S1: SEM images of  $\text{Li}_{1-z}\text{Ni}_{1+z}\text{O}_2$  with  $-0.05 \leq z \leq 0.05$ , scale bar 500 nm.

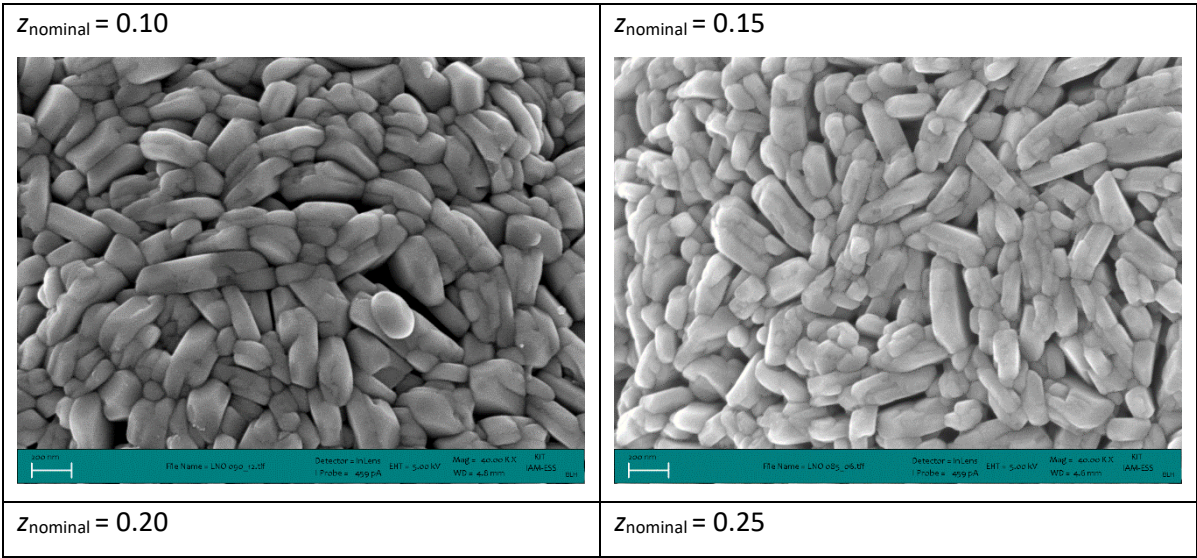

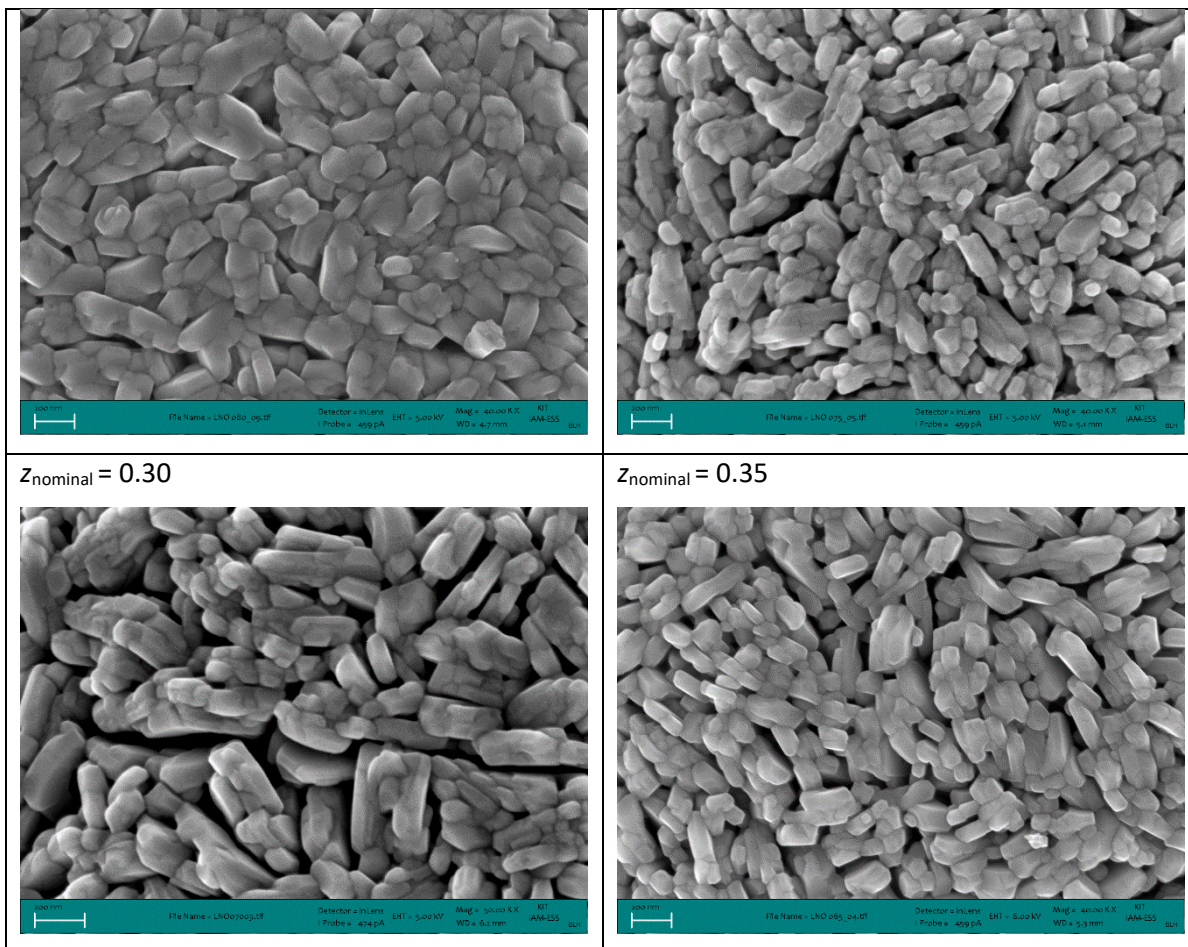

Figure S2: SEM images of  $\text{Li}_{1-z}\text{Ni}_{1+z}\text{O}_2$  with  $0.10 \leq z \leq 0.35$ , scale bar 200 nm.

## Elemental Analysis

Table S1: Summary of results from ICP-OES on metal content in  $\text{Li}_{1-z}\text{Ni}_{1+z}\text{O}_2$ .

| <b><math>z_{\text{nominal}}</math></b> | <b>Eq. Li</b> | <b>Eq. Ni</b> |
|----------------------------------------|---------------|---------------|
| -0.05                                  | 1.03(4)       | 0.965(14)     |
| -0.01                                  | 1.00(3)       | 0.999(14)     |
| 0.01                                   | 0.98(4)       | 1.017(14)     |
| 0.05                                   | 0.95(3)       | 1.051(15)     |
| 0.10                                   | 0.90(3)       | 1.099(15)     |
| 0.15                                   | 0.86(3)       | 1.142(16)     |
| 0.20                                   | 0.80(3)       | 1.195(17)     |
| 0.25                                   | 0.76(3)       | 1.239(17)     |
| 0.30                                   | 0.71(3)       | 1.289(18)     |
| 0.35                                   | 0.66(2)       | 1.337(19)     |

## Diffraction patterns & crystallographic data

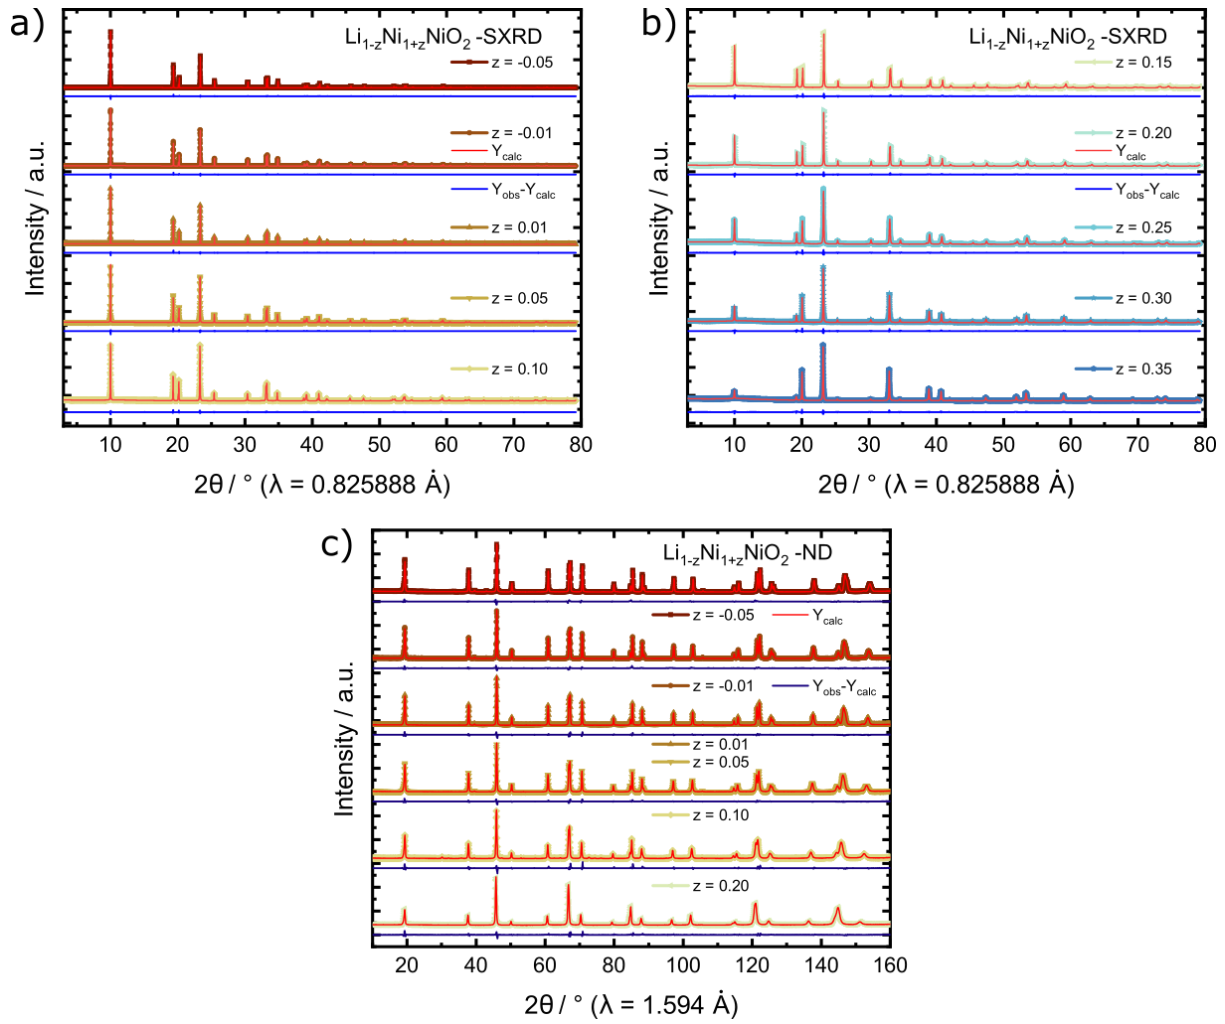

Figure 3: Patterns of  $\text{Li}_{1-z}\text{Ni}_{1+z}\text{O}_2$  for a)+b) synchrotron X-ray diffraction for  $-0.05 \leq z \leq 0.35$  and c) neutron diffraction for  $-0.05 \leq z \leq 0.1$  and  $z = 0.20$  with  $Y_{\text{obs}}$  in the color pattern used in the main manuscript as well as  $Y_{\text{calc}}$  in red and difference curve in blue.

Table S2: Atomic coordinates, site occupancy factors (SOF) and isotropic displacement parameters  $B_{\text{iso}}$  for  $\text{Li}_{1-z}\text{Ni}_{1+z}\text{O}_2$  at 303 K.

| atom | Wyckoff position & multiplicity | x | y | z              | SOF                        | $B_{\text{iso}}$            |
|------|---------------------------------|---|---|----------------|----------------------------|-----------------------------|
| Li   | 3b                              | 0 | 0 | $\frac{1}{2}$  | 1- $\text{Ni}_{\text{Li}}$ | $B_{\text{iso}}(\text{Li})$ |
| Ni   | 3b                              | 0 | 0 | $\frac{1}{2}$  | $\text{Ni}_{\text{Li}}$    | $B_{\text{iso}}(\text{Li})$ |
| Ni   | 3a                              | 0 | 0 | 0              | 1- $\text{Li}_{\text{Ni}}$ | $B_{\text{iso}}(\text{Ni})$ |
| Li   | 3a                              | 0 | 0 | 0              | $\text{Li}_{\text{Ni}}$    | $B_{\text{iso}}(\text{Ni})$ |
| O    | 6c                              | 0 | 0 | $z_{\text{O}}$ | 1                          | $B_{\text{iso}}(\text{O})$  |

## X-ray absorption spectroscopy

For  $\text{Li}_{1-z}\text{Ni}_{1+z}\text{O}_2$ , the change in composition is associated with a change in the oxidation state of Ni. If we use the oxidation states of +1 and -2 for Li and O, respectively, then the oxidation state of Ni as a function of the Ni content present in the crystalline phase can be described as seen in Table S3. This was confirmed by X-ray absorption spectroscopy (XAS). The measurements clearly show a successive oxidation of Ni with decreasing  $z$  in  $\text{Li}_{1-z}\text{Ni}_{1+z}\text{O}_2$  (Fig. S4). Assuming a Ni oxidation state of +3 for  $\text{LiNiO}_2$  ( $z = 0$ ), we clearly see a reduction toward 2+, and for the highest Li content ( $z = 0.35$ ,  $\text{Li}_{0.65}\text{Ni}_{1.35}\text{O}_2$ ) we see a reduction half way towards the state of NiO, i.e. we can conclude that the oxidation state is about 2.5, as suggested by Table S3.

Table S3: The calculated Ni oxidation state as a function of chemical composition.

| <b><math>z_{\text{nominal}}</math></b> | <b>total Ni from diffraction</b> | <b><math>z</math> from diffraction</b> | <b>Chemical composition</b>                    | <b>Ni oxidation state</b> |
|----------------------------------------|----------------------------------|----------------------------------------|------------------------------------------------|---------------------------|
| 1                                      | --                               | --                                     | NiO                                            | 2.00                      |
| 0.35                                   | 1.353                            | 0.353                                  | $\text{Li}_{0.647}\text{Ni}_{1.353}\text{O}_2$ | 2.48                      |
| 0.3                                    | 1.298                            | 0.298                                  | $\text{Li}_{0.702}\text{Ni}_{1.298}\text{O}_2$ | 2.54                      |
| 0.25                                   | 1.256                            | 0.256                                  | $\text{Li}_{0.744}\text{Ni}_{1.256}\text{O}_2$ | 2.59                      |
| 0.2                                    | 1.211                            | 0.211                                  | $\text{Li}_{0.789}\text{Ni}_{1.211}\text{O}_2$ | 2.65                      |
| 0.15                                   | 1.156                            | 0.156                                  | $\text{Li}_{0.844}\text{Ni}_{1.156}\text{O}_2$ | 2.73                      |
| 0.1                                    | 1.122                            | 0.122                                  | $\text{Li}_{0.878}\text{Ni}_{1.122}\text{O}_2$ | 2.78                      |
| 0.05                                   | 1.065                            | 0.065                                  | $\text{Li}_{0.935}\text{Ni}_{1.065}\text{O}_2$ | 2.88                      |
| 0.01                                   | 1.041                            | 0.041                                  | $\text{Li}_{0.959}\text{Ni}_{1.041}\text{O}_2$ | 2.92                      |
| -0.01                                  | 1.023                            | 0.023                                  | $\text{Li}_{0.977}\text{Ni}_{1.023}\text{O}_2$ | 2.96                      |
| -0.05                                  | 1.008                            | 0.008                                  | $\text{Li}_{0.992}\text{Ni}_{1.008}\text{O}_2$ | 2.98                      |

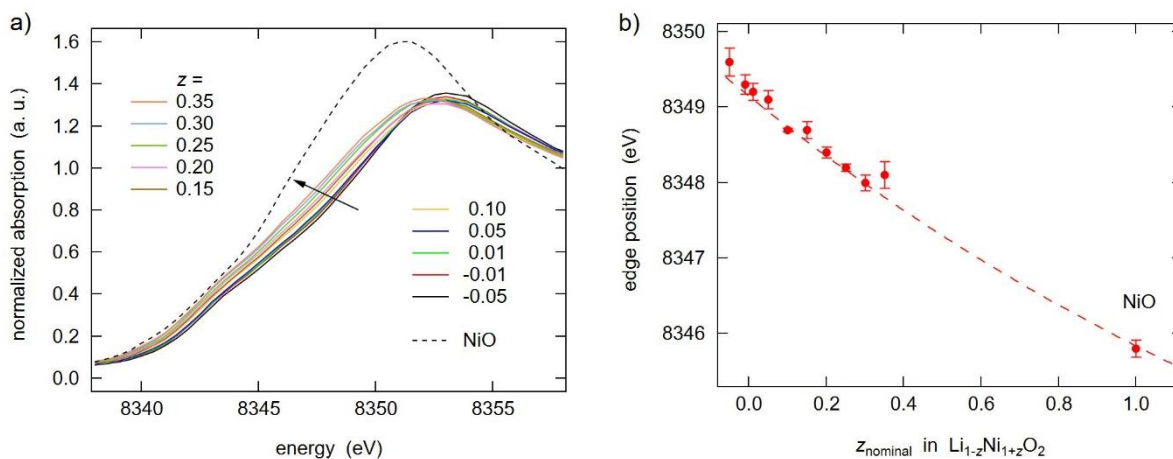

Figure S4: a) Ni K edge XAS spectra of  $\text{Li}_{1-z}\text{Ni}_{1+z}\text{O}_2$  ( $-0.05 < z < 0.35$ ) and b) edge position as a function of nominal  $z$ , where NiO has  $z = 1$ .

## Magnetometry

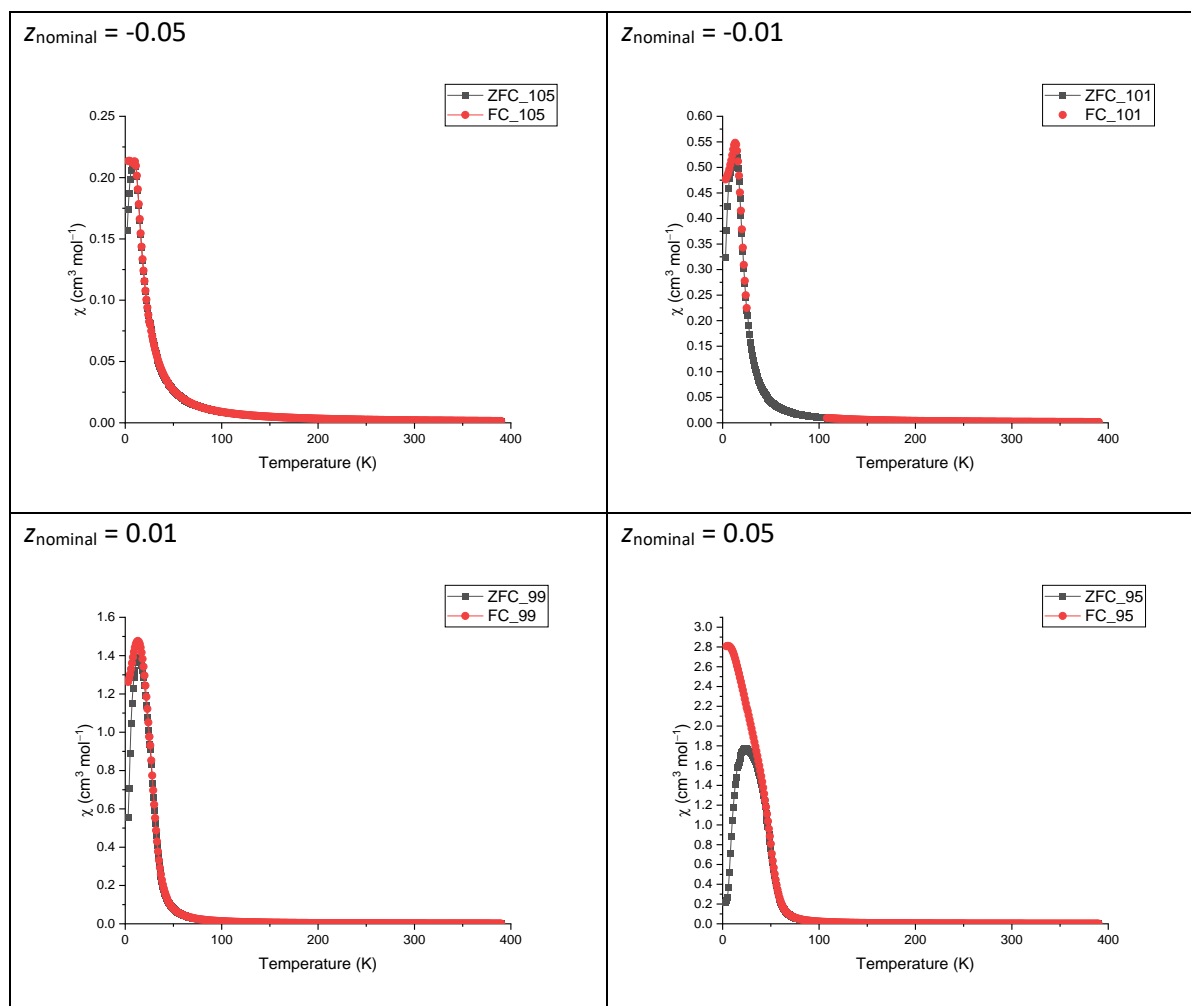

Figure S5: Molar magnetic susceptibility vs. temperature curves for  $\text{Li}_{1-z}\text{Ni}_{1+z}\text{O}_2$  for  $-0.05 \leq z \leq 0.05$  range.

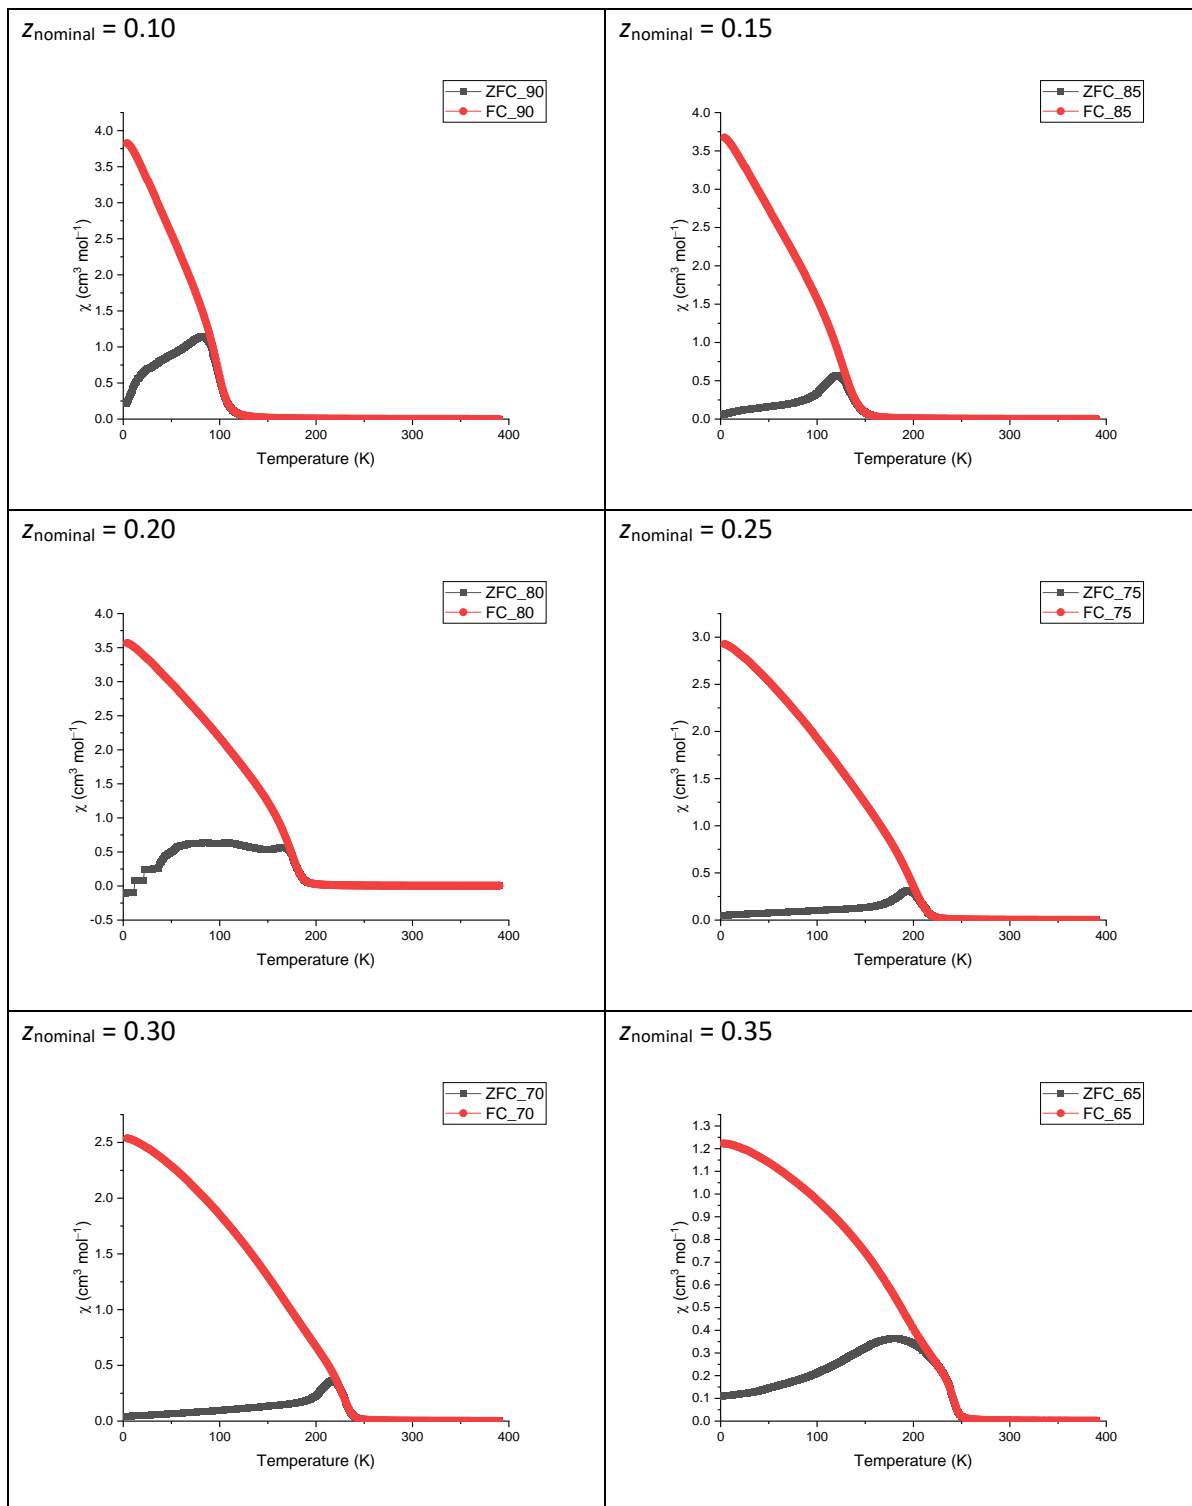

Figure S6: Molar magnetic susceptibility vs. temperature curves for  $\text{Li}_{1-z}\text{Ni}_{1+z}\text{O}_2$  for  $0.10 \leq z \leq 0.35$  range.



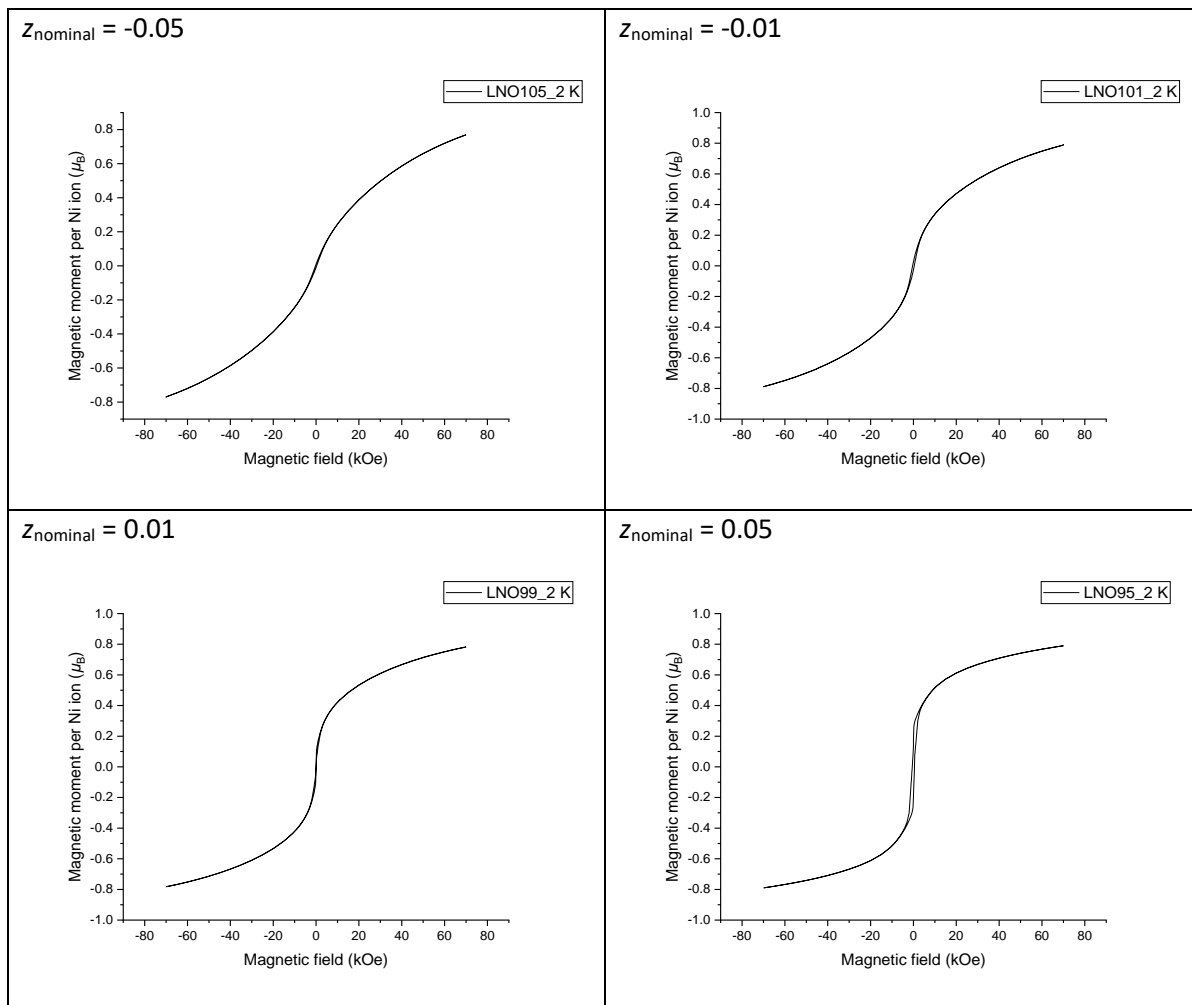

Figure S7: Magnetic moment vs. magnetic field curves measured at 2 K for  $\text{Li}_{1-z}\text{Ni}_{1+z}\text{O}_2$  for  $-0.05 \leq z \leq 0.05$  range.

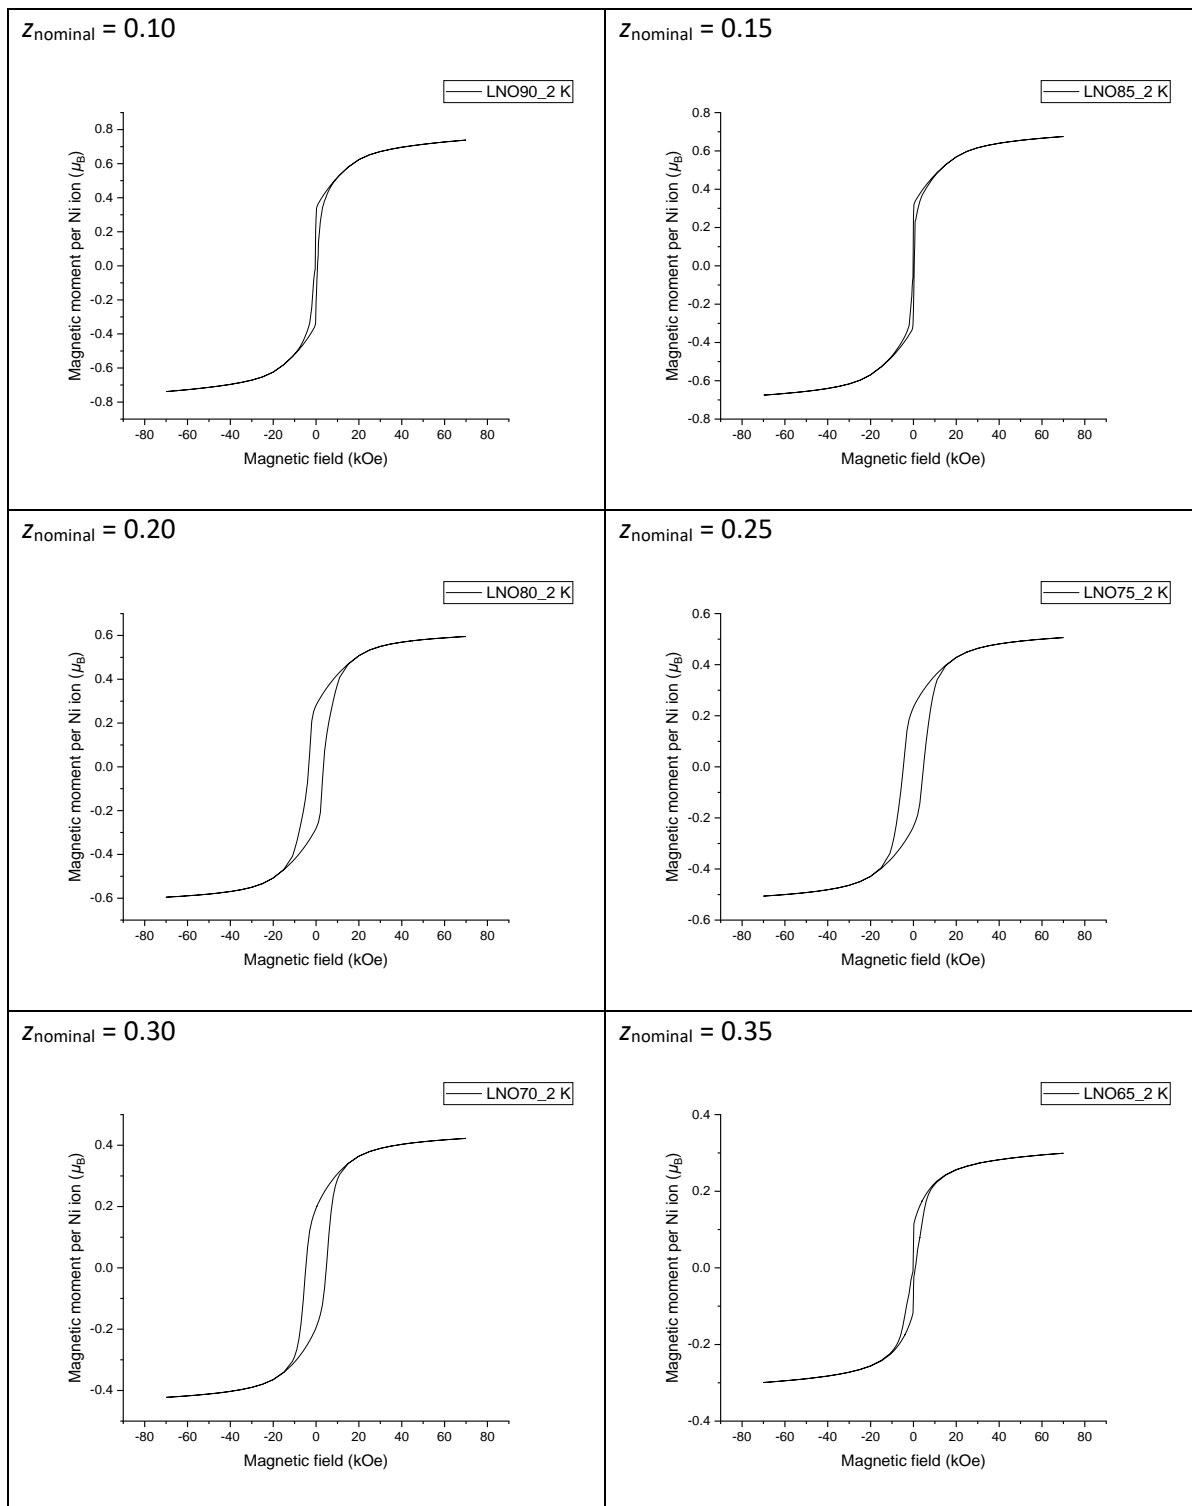

Figure S8: Magnetic moment vs. magnetic field curves measured at 2 K for  $\text{Li}_{1-z}\text{Ni}_{1+z}\text{O}_2$  for  $0.10 \leq z \leq 0.35$  range.
